# Supplementary material
Source: PubMed Central journal article supplement (PMC549340)
Supplement: eukcell_4_2_253__1.pdf [file eukcell_4_2_253__1.pdf]

## Supplementary data

**Table S1a.** Putative plastid-targeted proteins in *P. wickerhamii* for which the full-length targeting-peptide was identified.

| Protein <sup>a</sup>                                                                                                                                                                                                                                                                                                                                                                                                                                                                                                                                            | TargetP <sup>b</sup> | ChloroP <sup>c</sup> | iPSORT <sup>d</sup> | Predotar <sup>e</sup> | Intracellular localization in plants and algae <sup>f</sup> |
|-----------------------------------------------------------------------------------------------------------------------------------------------------------------------------------------------------------------------------------------------------------------------------------------------------------------------------------------------------------------------------------------------------------------------------------------------------------------------------------------------------------------------------------------------------------------|----------------------|----------------------|---------------------|-----------------------|-------------------------------------------------------------|
| 1<br>>AY616038; 60 kDa chaperonin alpha subunit<br>MMAQPFTGSRIQSRPIRGGRAGRGARQVVRAEAKDILFDNESRRKMQVGIN<br>KIADAVAVTLGPRGRNVVLEQAYGTPQVINDGVSIARAIELADPVENAGAQ<br>LIKEVAGKTNDTAGDGTTTATVLAREMIHLGLQVVTAGANPVSIIKRGIDKA<br>CTYLVGELAAARARPVTGSDDIRAVAAISAGNDDAIGAMIADALEKV<br><br><b>Note:</b> The estimate of the length of the N-terminal extension is the result of multiple alignments; the first residues after the sequence in <b>blue</b> represent the first stretch of conserved residues among land plants and algae, including <i>P. wickerhamii</i> . | M                    | -                    | P                   | M                     | P <sup>#</sup>                                              |
| 2<br>>AY616039; 60 kDa chaperonin beta subunit<br>MNSATLTCGPSTSGLVGGHGAFAFKARSGSRAAVRRSVQTRAAKQLHFNTN<br>GEALKRMQAGVDKLASVVGVTLGPKGRNVVLETKYGSPKIVNDGVTVARE<br>VELEDPVENIGAKLVRQAASKTNDLAGDGTTTATILAAGIIQEGMRIVAAGV<br>NPVQVIRGLERTVTHLVAELAALAKPVSDAELKDVATVSAGGSAAIGELIA<br>AAMARVGRQGVTMEES                                                                                                                                                                                                                                                                  | P                    | P                    | P                   | P                     | P <sup>#</sup>                                              |
| 3<br>>AY616045; catalytic subunit of ClpP5 protease<br>MQVLGLAQPDA SPTFDPTTLTAKAFYVGDAVTESSRQSTRMAQDTRAPGR<br>APPDLPSLLLDGRICYIGMPLVPAVTELVISELLWLNYSSTPKPVYVYINSTG<br>SQREGGESVGFETEATAIMDTMAYIRPDIYTLVIGQACGNAAMLLASGKKG<br>HRFALPHS                                                                                                                                                                                                                                                                                                                          | -                    | P                    | -                   | -                     | P <sup>#</sup>                                              |
| 4<br>>AY616049; similarity to thylakoid lumenal 29.8 kDa protein from <i>A. thaliana</i><br>MLSSKVFANACDKFVRHGGDCKRAFPSNTPRNVRAAAGYDAAQSGTSN<br>DSLDFEVGRRQALAAALVTPAILQANAALAVQGLTAGRIPGVSSADADG<br>FYRYTRPEGKSGGHGVGWISEMPRYTFKVRPGWEETPVSIIADLGGTEIDLR<br>ACPEEGSLQVVVAPVLRFAADVGNADVRITDLNKPENIISGFAPELFGRPLD<br>DEDVLEQRVLEKEGVPY                                                                                                                                                                                                                          | -                    | P                    | -                   | M                     | P <sup>#</sup>                                              |
| 5<br>>AY616050; putative plastid ATP/ADP-transporter                                                                                                                                                                                                                                                                                                                                                                                                                                                                                                            | P                    | P                    | P                   | P                     | P <sup>#</sup>                                              |

---

|    |                                                                                                                                                                                                                                                                                                                                                                                                                                                                         |   |   |   |   |      |
|----|-------------------------------------------------------------------------------------------------------------------------------------------------------------------------------------------------------------------------------------------------------------------------------------------------------------------------------------------------------------------------------------------------------------------------------------------------------------------------|---|---|---|---|------|
|    | <p>MQLAPVCTATLPVASCPRRLTACRPIARAACLSTSKSAMAAQPLMAKPMG<br/> MASLPSQQRVKASASVRVEASNSAATPAPKEGSFLGIAAFTWQKIPLGLMFF<br/> CILFNITILRDTKDVLVVTAPGSGAEIIPFLKTWVNLPMAIGFTILYTKLANV<br/> LNNEQLFYVCIIPFLAFFSAFAFLLYPCATSCTPPSGPPRRSPSMAP</p>                                                                                                                                                                                                                                     |   |   |   |   |      |
| 6  | <p>&gt;AY616056; pyruvate kinase, similar to isozyme G<br/> MASPCSSLRPTRLLGPGSGLAYWPDHTPDCMHRDPPPSRSNGKTDSSRPRA<br/> STSTPALPGYAKGVLSSSNAKMMMAEDPASEASSLDIPTRKTKTVCTIGPTSC<br/> DREAFFRLADAGMNVVRLNMSHGDHASHQQVIDLVREYNALGRRNLAIML<br/> DTKGPEVRSGLT<br/> QPLDLEKGDITFTIVAGADGTNNRIGVNYDGFIDDVEVGDMLLVDDGGIMT<br/> MLVKSXSDTEVLVEVLGLGHEISRHLTFGEVR</p>                                                                                                                 | P | - | P | - | P, C |
| 7  | <p>&gt;AY616059; dihydrolipoamide S-acetyltransferase<br/> MQASSAVMMQCTSVLAGRPTRVSLPRGPGRRILRPLSAVKDVFMPALSST<br/> MTEGKIVSWLKSPGDKVAKGESIVVVEDKADMDVEAF AEGILGCITVPEG<br/> GVAGVGSIAIYIAETEADLEAAKAKGDSSAGTTAAAPAPVAAA V</p>                                                                                                                                                                                                                                           | P | P | P | P | P, M |
| 8  | <p>&gt;AY616060; pyruvate dehydrogenase E1 beta subunit (acetyl-transferring)<br/> MAALVGSRRISRTCPGASKSQTSTLSPACIFIRSNVAPKGRLSAGRMMIKTHA<br/> KKEMMMWESLREGLDEEMERDPNVCLMGEDVGHYGGSYKVSYGLHKKY<br/> GDMRLLDTPICENGFMGMGVGAAMTGLRPVVEGMNMGFLLAFNQISNN<br/> CGMLHYTSGGQFKVPMVIRGPGGVGRQLGAEHSQRLESYFQSIPGVQLVAV<br/> STARNAKGLLK</p>                                                                                                                                      | P | P | P | P | P, M |
| 9  | <p>&gt;AY616061; small subunit of glucose-1-phosphate adenylyltransferase<br/> MSELPLSPLRTAPSARCGVHLSQDAPDWTGRLARPAYACRS LPKSHAFTSP<br/> PRQSKAVQPRATAQLDRDVASILNLTNGSPDPRPADISRTVLG IILGGGAGSR<br/> LYPLTKQRAKPAVPLGANYRLIDIPVSNCSNGV NKIYCLTQFN SASLNRHLS<br/> QRYNSYNSNVGGYNARGFVEVLAASQTTTQKNWFQGTADAVRQYLWLFE<br/> EATRGGVEDYLILSGDHLRMDYSEFVTAHRRAGAEITVAALPCTEKEAGA<br/> FGLMKIDDSGRILDFAEKPKGEELRGMQVDTLLGLDAESAARKPYIASMGI<br/> YLCKASAMHLLTDRFATQNDFGSDII</p> | P | P | - | - | P, C |
| 10 | <p>&gt;AY616063; 1,4-alpha-glucan branching enzyme<br/> MQLASAVRPRGVFGGTRHSARVHGIVTAGAAPDGLGSPIELARRENAALKR<br/> SIDQAETSVSKLESLASAGVPIPLSTTSSPDS SARKNGSNGDAVEAAEPAS<br/> DAGPLEPEDYWSPVQHVPDGVALKETLGPITPVPDHDGTDCLKWDASLWS<br/> HADHFKYRWHIFKSIRAAIDANEGGLEQFSQGYKYYGINRGEHEGK</p>                                                                                                                                                                                   | M | - | M | M | P    |

---

**Note:** The estimate of the length of the N-terminal extension is the result of multiple alignments with sequences from land plants; the first residue after the sequence in **blue** corresponds to the N-terminal methionine in proteins that lack the N-terminal extension.

|    |                                                                                                                                                                                                                                                                                                                                               |   |   |   |      |                |
|----|-----------------------------------------------------------------------------------------------------------------------------------------------------------------------------------------------------------------------------------------------------------------------------------------------------------------------------------------------|---|---|---|------|----------------|
| 11 | >AY616065; biotin carboxylase, subunit of acetyl-CoA carboxylase<br>MAYVAPPGQLRASAGWVPSATQPSMRVAAVRPARRSVARMTVRAEGAGN<br>GVAAAARTPITKVLIANRGEIAVRVIRACREMGIKSVAVYSVADRDCLHVQ<br>LADEAVCIGEASSAESYLVNPTIIAAAMSRGADAIHPGYGFLSENASFVDICK<br>DHGIEF                                                                                               | P | P | M | P    | P, C, ER       |
| 12 | >AY616069 3-oxoacyl-[acyl-carrier protein] synthase<br>MATQSLAFPRVGSSTHCFGRREPRNRRHVHTQHVSCEQSSSAGGGKPKRRVV<br>VTGQGVVTSLGQKTKQFYEKLLAGTSGIAPIEGFDTTGYSTTFAGEVKSUDA<br>GPYVARKWVKRMDEVMKFMFVAGKQALEDAGLPFEGPDLQDLRALC                                                                                                                         | P | P | M | -    | P              |
| 13 | >AY616070; 3-oxoacyl-[acyl-carrier protein] reductase<br>MLRHLQVPRALLRQHGCARSTFAARPSTARRSTVNVQVRADSAVAEAPA<br>KSVQQGLEEGVTLVTGSSRGIGRAIALRLGAAGGRIVVNYAASSKAAEEVA<br>HEIEALGGSIAIVVKGDLAKVSDAQALVKAADVKGWTLDALVNNAGITRDT<br>LMLRMKPEQWQQVIDVNLGVSFYATQAAVKVMAKKRKGRIVNISSVVGLT<br>GNAGAGQLLSGSKA                                              | M | P | M | M    | P <sup>#</sup> |
| 14 | >AY616071; acyl-[acyl-carrier protein] desaturase<br>MALTSVRPAFHAMSADLRRGGPSASAPRPSRASLRVRAAIASEAPVAAMSK<br>ASPGPTVYSKLDRAHTLTPERMELINGMADFAEERILPVLQPVEKLWQPQD<br>MLPDPESEDFLDQVAELRARSEGVPDAYYVVVLVGDMITTEEALPTYMAMLN<br>TLDGVRDETGAADHPWGRWTRQWVAEENRHGDLLNKYCWLTGRVNMK<br>AIEVTIQNLI                                                      | P | P | P | P, M | P, C           |
| 15 | >AY616072; beta-hydroxyacyl-[acyl-carrier protein] dehydratase (similar to FabZ<br>from <i>E. coli</i> )<br>MASVCVANPRAHSLPRFQVSSSVSRARCVPARSRRSNLAAQANGVASSA<br>ATESLAVVKSGPNMKALKDIQEIMEILPHRYPFLLVDRVLEWETGKYAVGY<br>KCITVNDNFFPGHFPTRAIMPVGLQVEAMAQLAGIAMIDPADRGQQNNFFF<br>GGVDGVRWKKPVVPGDVLMMRVDVIKFNKRHGICKVDAKAYVGTDLVC<br>QGELTLVMLK | P | P | M | P    | P <sup>#</sup> |
| 16 | >AY616074; 1,2-diacylglycerol 3-beta-galactosyltransferase (MGDG synthase type<br>A)                                                                                                                                                                                                                                                          | - | - | M | -    | P              |

MGGSTQYERHLCASSITMTSLPLASSAGRVCEPTLVASAPSWDVKFWKTGR  
 DGLKPFGLPDASGRGTGKVALPFKPGQKCSSGPGIRLSNSGLRRLPRLAMG  
 GSGHGAGAYSFFMIQAPRLWPVSWRIPPCKGSAGEDKQRILILMSDTGGG  
 HRASAQALHSGFQELYGDKYKIDVLDIWTNYTPWP

**Note:** Multiple alignments with sequences from land plants revealed a weak conservation in the first 120-130 amino acids; the N-terminal methionine in proteins of prokaryotic origin (Firmicutes; YP\_080396) is located downstream of residue 130 from *P. wickerhamii*. The sequence in **blue** represents a rough estimate of the length of the N-terminal extension based on the average of the cleavage sites predicted by TargetP for four land plant sequences.

|    |                                                                                                                                                                                                                                                                                                                                                                                          |   |   |   |      |                |
|----|------------------------------------------------------------------------------------------------------------------------------------------------------------------------------------------------------------------------------------------------------------------------------------------------------------------------------------------------------------------------------------------|---|---|---|------|----------------|
| 17 | >AY616075; glycerol-3-phosphate O-acyltransferase<br><b>MAAAMGCVAFPVGP</b> ISTHRV <b>RHHSRIQRISQ</b> NAM <b>SRRSMPRE</b> LKTLASAA<br>PATAYVSPFSKVEHEEQLF <del>AILKAGTASGKVPKRLVDG</del> ITELYGNYKKAVV<br>GSNKPGATAD <del>FVAKVMASVCERVM</del> IQITSPFVFQSKHERMLEPYNYYEFGQ<br>RYIRGLVDFDTSRLGHADRFATIQEQLARGENVVLLANHQTEADPAIFALL                                                         | P | P | P | P    | P, M, C, ER    |
| 18 | >AY616077; 3-dehydroquinate synthase<br><b>MKGVC</b> PNSGL <b>GPVTC</b> SRAL <b>PRPFV</b> TPSR <b>HSPFLSG</b> PS <b>HAGVTQ</b> PLRR <b>Q</b><br><b>RRGHSLK</b> AKAASAPPAPPAMETVEVGLGTRTYPIYIGRGLLRQGE <b>LLRRHI</b><br>VGSSALIVTNQTVSKLYLDATLAALRGGNSGLRVESVVL <b>PDGEQ</b> NKTMEVL<br>QQVWTAAL <b>EARLDRNTTF</b> VALGGGVVGD <b>MAGFAAA</b> AYQRGVAFVQIPTT<br>VMAQVDSSVGGKTGVNHPLGKNMIGA | P | P | P | P    | P              |
| 19 | >AY616080; acetolactate synthase, small subunit<br><b>MQLTGAICQGA</b> V <b>VARPSSRLAFHAAHAPRCLTTPPRVHGTRV</b> PARAASAVA<br>RASSETTDPATSASEGEGYDVYVYEAEPLEEGVSKHTLN <b>V</b> FGDEAGMIN<br>RVAGVFARRGANIESLAVGLTQDKALFTIVATGTDATVANLCKQLAKLVN<br>VRYVEDITSSEHIQRELFIKVAAPPGVTRTEIQ                                                                                                         | P | P | P | -    | P              |
| 20 | >AY616081; acetolactate synthase, large subunit<br><b>MLGLCQLSTCERKPRN</b> PGAVKS <b>QTGLF</b> GAAP <b>STSRAARHALARRVVRG</b> T <b>PP</b><br><b>TAALARDQAGPD</b> SALAKAREAAHASLASPPPKEWVDRFGTAPRKGSDILV<br>QALEREGVDVLFAYPGGASMEIHQALTRSHTVRNILCRHEQGEVFAAEGYA<br>KVSGRVGVCIATSGPGATNLVTGLADALMDSVAMVAITGQVPRSLIGSDGF<br>PGDAHRGGD                                                        | P | P | P | P, M | P              |
| 21 | >AY616083; 3-isopropylmalate dehydrogenase                                                                                                                                                                                                                                                                                                                                               | P | P | P | M    | P <sup>#</sup> |

---

|    |                                                                                                                                                                                                                                                                                                                                                                                                                                          |   |   |   |   |         |
|----|------------------------------------------------------------------------------------------------------------------------------------------------------------------------------------------------------------------------------------------------------------------------------------------------------------------------------------------------------------------------------------------------------------------------------------------|---|---|---|---|---------|
|    | <p>MSALAPSTRIGVGAPARRAFAARSRCPRARPALATCAAHRVTVLPGDGIGP<br/> EITAVTLVLEAAGKAEGESFTTFTEALIGGAAAYDATGDPYPDATYRACADSD<br/> AVLLAAIGGYKWDALPSVSKPETGLLRSSLNANFANLRPATVIPELADASS<br/> LKREVLEGVDLLIVRELVGGIYFGQPRGFEIRNGEKVGFSTDIYSEFEVERIA<br/> HVA</p>                                                                                                                                                                                       |   |   |   |   |         |
| 22 | <p>&gt;AY616084; glycine hydroxymethyltransferase<br/> MQAIASSQPRFAGIRAETCGPGRQVQRLASRPNQARLVTPAQSRVVCLAAT<br/> LERQATGSMFFEDGSLDEVDP EIASIIRKEKVRQVTGLELIASENFTSRAVMT<br/> AVGSCMTNKYSEGLPGARYYGGNEFIDQAESLCQRRALEAFGLDPAEWGV<br/> NVQPHSGSPANFAVYTALLSPHDRIMGLDLP HGGH LTHGFQTPKRRVSATS<br/> VYFESMP</p>                                                                                                                               | P | P | P | - | P, M, C |
| 23 | <p>&gt;AY616085; 5,10-methylene-tetrahydrofolate dehydrogenase and 5,10-<br/> methenyltetrahydrofolate cyclohydrolase, bi-functional protein<br/> MSALCFGLQNRIP LRSPTERRSPRTVVAHPPQRRVSLTLRGSVVS AKRAVAT<br/> ASAMPAALIDGK KIAETIRGELKVEVDELRAQYNTVPGLAVVLVGERKDSQ<br/> TYVRSK KACDEVGINSFGADLPETATEEEVLAVVAKFNDDPNVHGILVQL<br/> PLPEHINEKRVLD AISLEKDVDGFHPNNIGELAMRGRSPTYV SCTPKGCLELL<br/> KRAVTLTAGKRAAVVGRSNIVGLPAALLLQ QEDATVT</p> | P | P | P | M | P, C    |
| 24 | <p>&gt;AY616086; cysteine synthase (= O-acetylserine (thiol)-lyase)<br/> MGGSHSKKSGATTDPLVTVLENKPSRSQATPPADTAPPPAKKNIVSSNITQVI<br/> GNTPLVRLNHLAETEGAKATILLKMESLEPNSSVKDRIGLAMIEDAEQSGKI<br/> TPGKTTLVEPTSGNTGIALAFVAAARGYKLVLTMPATMSLERRIVLRAFGA<br/> QLVLTDPAKGMKGALLKAE EIAAATPDSYILQQFENPANPAIH YTTTGPEIW<br/> NDAGGDVDVFIAG</p>                                                                                                     | P | P | M | - | P, M, C |
| 25 | <p>&gt;AY616088; aspartate-semialdehyde dehydrogenase<br/> MPLSLSSSRCPAVALGPRRASVTRASRSGPSKSRCTRSKDGVRAYIAIAGVT<br/> GAVGQEFLRVLTERNFPYSNIKMLASARSAGRQYEFEGETYTVEELTDKSFE<br/> GVDIALFSAGGSISKKYAAVASAAGATVVDNSSAFRMTEGVPLVIPEVNPEA<br/> MAGMKAGKGGIIANPNCSTI IALMAVAPLHRLAGVKRMVVSTYQAASGAG<br/> QAAMEEEL</p>                                                                                                                           | P | P | P | P | P       |
| 26 | <p>&gt;AY616089; threonine synthase<br/> MWGASRAAVERCAPAHRHLPPRGTS GVTLS CVPARRAPSGPSTCPSSP WLP<br/> APRAPRRGRPTP WDDVVYRAKDGGLLDVQHDFEALAKYDAKYWKTLFDG<br/> RVGTARWPHGSGVWSKKEWVLPQISDDDIVSMFEGNSNLFWAERFGRQIG<br/> MSDLVWKQCGNSHTGSFKDLGMTVLVSVQVNP AEQDQA</p>                                                                                                                                                                         | P | P | M | M | P       |

---

|    |                                                                                                                                                                                                                                                                                                                                                                                                                                                                                                                                                                            |   |   |   |   |                                 |
|----|----------------------------------------------------------------------------------------------------------------------------------------------------------------------------------------------------------------------------------------------------------------------------------------------------------------------------------------------------------------------------------------------------------------------------------------------------------------------------------------------------------------------------------------------------------------------------|---|---|---|---|---------------------------------|
| 27 | >AY616091; glutamate-cysteine ligase (gamma-glutamylcysteine synthetase)<br><b>MSCMLEKHWDAGSAAPS</b> VSTTRPHRS AVPEVETGPVPPINRVLFYIHIMCTD<br>KVATPVGAAPHLTLEDLVENLRKGCKPRSSWRIGTEAREVGVRLRLTPCPA<br>THQQISDLLTVIHDSNGWEYIKEGEAKIGLAHANETVTLEPGGQTELSGAPL<br>KDLHAVAQETKEHLIQVRAACDKVIGIDYMNIGFDPKWGFEDVPKMPKTRY<br>RYMREYMPKVGTLGHDMFRSCTIQVNLD FESEADMVEKFRVSLALQNV<br>AGALFANSPFRDGKPTGYKSWRLNVWTDVDNARCGRLPFVFDADFSFARY<br>AEWALDVP MYFLYRDGEYHDVGAQPFRDFFHGKLA AFPGLFPTMDDWDV<br>HLTTVFPDVRLKR FLEM RGADGGGWEFITALPALWVGLLYDAGAQA EAAR<br>LVADWTPEELDALQADVPRQALQATFRS | P | - | - | - | P, C                            |
| 28 | >AY700207; acetylglutamate kinase<br><b>MSALLPGTHLVS RPTKGWTPVRPARNVRPAGMGVSRAPMRPTICQSSTVAA</b><br>DTGTKLERFSP LDRVSVLSEALPYLQRF RGT VVIKYGGAAMKDPTLKAGV<br>VADLVLLATV GIRPVLVHGGGPEINIWLTKLGI EPNFKNGLRVTDEATMDV<br>VEMVLGGRV NKS LVTLIQSSG GRAVGLCGKDSIILARQMVEKDIGFVGEV<br>SGVR                                                                                                                                                                                                                                                                                        | P | P | P | P | P <sup>#</sup>                  |
| 29 | >AY700208; argininosuccinate lyase<br><b>MAAMACSTHIGAQLPRQTS GSRVGSRASTISAPSSRTRTLR</b> CTAAAAPADAP<br>AAKKLWGG RFTGATDPLMEKFNESLPFDRRMWAEDIRGSQAYAKSLARVG<br>VLTEEEASTLVDGLAAVAEEWAAGTFKV VPGDEDIHTANERRLSELVGPVG<br>GKLHTGRSRNDQC VTDTRLWLTGAVRELRASLQALIG                                                                                                                                                                                                                                                                                                               | P | P | P | P | P <sup>#</sup>                  |
| 30 | >AY616099; Phosphoribosyl-AMP cyclohydrolase.<br><b>MATAVGIASPAGRLRTVQAGAFCRAT</b> GVGHHTSVGRRAGAVGRVERAATL<br>APCSAGSTPTPLASLPSLKYDRQGLIPAIVQHVD TGEVLMQAYS DQA AILET<br>LETGLATFY SRSRKGRWCKGETSGHFIVLSVHMDCDRDSL IYLGSPIGPAC<br>HTNAPTCYFTALVPEAGGVVAEKGDST SRAQAPLPSLFALCPAAH HRAAQG<br>PRPRCQVRGAR PWRVGGPGCWVAGQTGWGSGPGLG                                                                                                                                                                                                                                           | M | P | P | P | P <sup>#</sup>                  |
| 31 | >AY616093; phosphoribosylformylglycinamide cyclo-ligase<br><b>MSAASLLRQAACQRTAGEPSCSYAAPLHRV FCTPRRLMGHRARA AHLIPRA</b><br>SGLSYKDAGVDIDAGNELV RRIQKMNPNIGGFSGMV PFGDSFLVAGTDGVG<br>TKLKLAFD VDKHDTV GIDL VAMSVNDIITSGAQPMFFLDYFATGKLEVDTA<br>EQVIK GIVEGCRQSDCTLMGGETAEMP GFYSPGEYDLGWLCGGVCEAEPRD                                                                                                                                                                                                                                                                        | M | - | M | - | P <sup>#</sup> , M <sup>#</sup> |

**Note:** The estimate of the length of the N-terminal extension is the result of multiple alignments with sequences from land plants that have N-terminal extensions and

from prokaryotic (including cyanobacterial) sequences; the first residue after the sequence in **blue** corresponds to the N-terminal methionine in a proteobacterial protein (NP\_274275).

|    |                                                                                                                                                                                                                                                                                                                                                                                                                                                                                                                          |   |   |   |   |                |
|----|--------------------------------------------------------------------------------------------------------------------------------------------------------------------------------------------------------------------------------------------------------------------------------------------------------------------------------------------------------------------------------------------------------------------------------------------------------------------------------------------------------------------------|---|---|---|---|----------------|
| 32 | >AY616094; phosphoribosylaminoimidazole-succinocarboxamide synthase<br><b>MAVQCSSARALRQTGPIPSAGAVRRLSRAHVRLCAVPQQPRIRRCIMHAV</b><br>PSAHVEAVAGLDASLTPIQAALDNCLTETSLELPGEHYVGKVRDITYDLGD<br>KLLIVTTDRQSAFDRHLASIPFKGQILNQTSAWWMEATRSIVPNALLGLPDP<br>NASLMTKCTVFPVEFVCRGYMTGSTDTSWTHYAAGERRYCGNDFPDGM<br>VKNARLPVNVITPTTKSAEHDVPISP                                                                                                                                                                                        | P | P | P | - | P <sup>#</sup> |
| 33 | >AY616096; phosphoribosylaminoimidazolecarboxamide formyltransferase<br><b>MTGVAAQVVASPSRCLFASSQRTSKTASTSRCPSSRRWASLTTPSAMSQTSP</b><br><b>AAAAPTQVVKGDGKQVLS</b> VSDKAELIPFVQGLVELGYDIISTGGSATSLDA<br>AGVPVERVENVTGFPEMLDGRVKTLPVAVHGGILARRELP SHMAALAEHDI<br>DLINIVVVNLYPFRQTVTAAVKPAYEVAVENIDIGGSPMIRAAAKNHAHV<br>VVVDPADYAMVLERLRAGTADAALRRQLAWKAFQHTATYDATVAEWLW<br>GEVGTGPAPERCVPMQLCSTLRYGENPHQAAAFYTDLSLGEAGRGGVATA<br>VQHHGKELSYNNYLDADAAYGAVCDIAAPACAIVKHTNPCGVAARDLRE<br>AYRLAVRADPTSAFGGIVAFNREVDADLARELREFRS | P | P | P | - | P <sup>#</sup> |
| 34 | >AY616097; adenylosuccinate synthetase<br><b>MACLSVSPAASMAVCSSRGHAACRLSSRLVQLPRQCARKSSRPGAVAARG</b><br><b>FGSVSPAQRLR</b> AGASAAPASVKTEEFDPQVVVVLGMQWGDEGKGLVDIL<br>AQKYEIVARAQGGANAGHTIYDTEGNKWKLLHLLPSGILNPKATCVVGNV<br>VVHLPDLLDEIKGMEARGVSVKGRLLHSSRAHLLFDLHKEIDARREEELAGT                                                                                                                                                                                                                                           | P | P | P | P | P <sup>#</sup> |
| 35 | >AY616100; ferredoxin<br><b>MALAMTPASLVWPPGRAPAQPSRSSPLVPARLAVIRSPVALLKHSVVCQSY</b><br>KVTFQLENGEEETIEVPEDQYILDAADDAGLDLPYSCRSGTCSTCVGKVVSG<br>ELDQSDQSFLDDAQMEKGYALLCVAYPTTDCVIQTHKEEELY                                                                                                                                                                                                                                                                                                                                | P | P | P | P | P <sup>#</sup> |
| 36 | >AY616101; similar to thioredoxin y<br><b>MGSLALASVGCRTSLPLQSTTRFGARASFHESRRQAPRTARRVSPCQRQHGI</b><br><b>V</b> ARAGTSDLIQEVSALEEAQARAKPLVIDFYATWCGPCVLQAKELVKV<br>AEQLGDGVQILKIDTDDNPDISNQLQIMGLPTVIVPTDPSKPALRTEGLLSAE<br>KIVGLINSSGPATVAPSDVGRPACFEGRTCFTYERVLTTVIPALHGCSMHV                                                                                                                                                                                                                                           | P | P | M | P | P, C           |
| 37 | >AY616105; adenylyl-sulfate reductase (glutathione)<br><b>MLTQALPLAHSVPVRCTGRFHGSKFLATPCQGTAAACPPSPANPGSAHLRRG</b>                                                                                                                                                                                                                                                                                                                                                                                                       | P | P | P | - | P              |

---

|    |                                                                                                                                                                                                                                                                                     |   |   |   |   |   |
|----|-------------------------------------------------------------------------------------------------------------------------------------------------------------------------------------------------------------------------------------------------------------------------------------|---|---|---|---|---|
|    | TLEAPVADIPARTLDWPSIAQNLDKSPLEIMDHALATFGDTIGIAWGAED<br>VALIEY AHLTGRPFVFLDTGRLNPETYRVFAAVEKH YGIKIEYTFPDAQE<br>TMDLVREKGGQFSFYEDGHGECRVRKVRPLRRQLSGLRAWITGQRKDQSP<br>GTRQAVPV                                                                                                        |   |   |   |   |   |
| 38 | >AY616106; geranylgeranyl diphosphate synthase (farnesyltranstransferase)<br>MGFSTMPAVSAPCLRAFTHGPRYMPGRPPRSSRNHLQSPRGTAEVSSPPSSA<br>NRVHPLSVFDFRVYMSQRAALVDAALDVAAPLQYPERLHSAMRYSSLGGG<br>KRVRPALCLAAACELVGGCLEVAMPAACAVEMIHTMSLIHDDL PAMDDDDV<br>RRGQPANHRAFGEDIAILAGDALLALAFEHVA | P | P | P | M | P |
| 39 | >AY616113; Mg chelatase, subunit<br>MLLAKPFMRLVMGPMRCPRNAMAAPLSRKHLRVQAVAAVAENGA AVQ<br>AAEGQARPIFPFTA VIGQEEMKLALILNVIDPKIGGVMIMGDRGTGKTTTIRA<br>LADLLPQVPVVAKDPFNSDPFDAELMSEEVQR LKAGEELPVGSMKIPMVD<br>LPLGATEDRVCGTIDIEKALTEGVKAFEPGLLA                                          | M | P | M | M | P |

---

<sup>a</sup>The amino acid sequence in **red** corresponds to the sequence located between the N-terminal methionine and the cleavage site predicted by TargetP, or for AY616045, AY616049, AY616070 and AY616113, the cleavage site predicted by ChloroP. When the aforementioned two programs failed to predict a plastid-targeting peptide, the length of the N-terminal extensions was estimated by multiple alignments which included *P. wickerhamii* sequences, best-BLAST proteins with plastid targeting-peptides, prokaryotic/cyanobacterial homologues and, when applicable, eukaryotic proteins cytosol-localized. The first amino acid after the sequence in **blue** corresponds to the N-terminal methionine in proteins that do not have such extensions or for AY616038, to the first stretch of conserved residues. The note at the end of the amino acid sequence of these clusters provides detailed information for each case; the accession numbers are for GenBank. In all situations, the sequences that were identified as targeting-peptides represent extensions compared with their prokaryotic/cyanobacterial homologues or/and with eukaryotic proteins that lack N-terminal extensions, i.e., cytosol-localized.



<sup>b</sup>TargetP (<http://www.cbs.dtu.dk/services/TargetP>) predicts N-terminal sorting peptides, including those for plastid and mitochondrial localization; the dash (-) implies that the program was not able to identify any N-terminal sorting peptides. The detailed results of the prediction can be found in Table S1b.

<sup>c</sup>ChloroP (<http://www.cbs.dtu.dk/services/ChloroP>) predicts only the presence of plastid-targeting peptides, the dash (-) indicates that the program was not able to identify this peptide. The detailed results of the prediction can be found in Table S1c.

<sup>d</sup>IPSort (<http://biocaml.org/ipsort/iPSORT>) predicts the presence of a signal peptide, as well as the presence of a plastid or mitochondrial targeting peptide. The dash (-) implies that the program was not able to identify any N-terminal sorting signals.

<sup>e</sup>Predotar (<http://www.inra.fr/predotar>) can identify putative mitochondrial and plastid targeting sequences. If the score is higher than 0.5 for both the mitochondrion and the plastid, the prediction will be for targeting to both cellular compartments. The dash (-) indicates that the program was not able to identify any N-terminal mitochondrial or plastid sorting peptides. The detailed results of the prediction can be found in Table S1d.

<sup>f</sup>The intracellular localization in land plants and algae of the proteins which are similar to those identified in *P. wickerhamii* was compiled from the Brenda (<http://www.brenda.uni-koeln.de>), TAIR (<http://www.arabidopsis.org/index.jsp>) and Gramene (<http://www.gramene.org>) databases, and from journal articles related to the best-BLAST proteins. The Brenda database provides comprehensive information about enzymes for which the intracellular localization was determined by experiments such as immunolocalization and subcellular fractionation. For enzymes for which this kind of data is not present in the Brenda database and for proteins that are not enzymes, we used the other aforementioned sources. In this situation the abbreviation for intracellular

localization is marked with #. Abbreviations: P, plastid targeted; M, mitochondrial targeted; C, cytosolic; ER, endoplasmic reticulum (i.e., microsomal fraction).

**Table S1b.** TargetP prediction results for plastid-targeted proteins from *P. wickerhamii*

| <b>Name</b> | <b>Length</b> | <b>cTP</b> | <b>mTP</b> | <b>SP</b> | <b>other</b> | <b>Loc.</b> | <b>RC</b> | <b>TPlen</b> |
|-------------|---------------|------------|------------|-----------|--------------|-------------|-----------|--------------|
| AY616038    | 199           | 0.276      | 0.564      | 0.019     | 0.209        | M           | 4         | 31           |
| AY616039    | 220           | 0.920      | 0.206      | 0.005     | 0.071        | C           | 2         | 30           |
| AY616045    | 162           | 0.044      | 0.226      | 0.015     | 0.873        | -           | 2         | -            |
| AY616049    | 220           | 0.121      | 0.260      | 0.034     | 0.566        | -           | 4         | -            |
| AY616050    | 202           | 0.884      | 0.103      | 0.014     | 0.019        | C           | 2         | 66           |
| AY616056    | 251           | 0.433      | 0.251      | 0.003     | 0.125        | C           | 5         | 76           |
| AY616059    | 146           | 0.906      | 0.214      | 0.020     | 0.023        | C           | 2         | 21           |
| AY616060    | 211           | 0.895      | 0.358      | 0.009     | 0.017        | C           | 3         | 32           |
| AY616061    | 337           | 0.529      | 0.325      | 0.002     | 0.181        | C           | 4         | 54           |
| AY616063    | 200           | 0.063      | 0.811      | 0.001     | 0.103        | M           | 2         | 60           |
| AY616065    | 159           | 0.773      | 0.527      | 0.004     | 0.017        | C           | 4         | 43           |
| AY616069    | 150           | 0.793      | 0.288      | 0.022     | 0.062        | C           | 3         | 34           |
| AY616070    | 215           | 0.170      | 0.925      | 0.005     | 0.017        | M           | 2         | 41           |
| AY616071    | 209           | 0.826      | 0.479      | 0.009     | 0.017        | C           | 4         | 37           |
| AY616072    | 210           | 0.905      | 0.470      | 0.009     | 0.012        | C           | 3         | 47           |
| AY616074    | 188           | 0.108      | 0.232      | 0.054     | 0.516        | -           | 4         | -            |
| AY616075    | 204           | 0.978      | 0.211      | 0.005     | 0.013        | C           | 2         | 47           |
| AY616077    | 230           | 0.930      | 0.049      | 0.007     | 0.077        | C           | 1         | 59           |
| AY616080    | 186           | 0.701      | 0.627      | 0.011     | 0.008        | C           | 5         | 45           |
| AY616081    | 213           | 0.692      | 0.354      | 0.001     | 0.118        | C           | 4         | 52           |
| AY616083    | 211           | 0.764      | 0.612      | 0.028     | 0.013        | C           | 5         | 36           |
| AY616084    | 212           | 0.756      | 0.248      | 0.005     | 0.116        | C           | 3         | 48           |
| AY616085    | 244           | 0.901      | 0.285      | 0.003     | 0.034        | C           | 2         | 71           |
| AY616086    | 221           | 0.613      | 0.057      | 0.025     | 0.430        | C           | 5         | 60           |
| AY616088    | 215           | 0.939      | 0.406      | 0.012     | 0.013        | C           | 3         | 24           |
| AY616089    | 187           | 0.758      | 0.590      | 0.007     | 0.015        | C           | 5         | 33           |
| AY616091    | 431           | 0.598      | 0.086      | 0.028     | 0.389        | C           | 4         | 17           |
| AY700207    | 208           | 0.943      | 0.281      | 0.005     | 0.040        | C           | 2         | 50           |
| AY700208    | 190           | 0.924      | 0.504      | 0.007     | 0.018        | C           | 3         | 41           |
| AY616099    | 240           | 0.437      | 0.500      | 0.010     | 0.038        | M           | 5         | 25           |
| AY616093    | 204           | 0.466      | 0.768      | 0.007     | 0.026        | M           | 4         | 38           |
| AY616094    | 229           | 0.870      | 0.487      | 0.003     | 0.010        | C           | 4         | 52           |
| AY616096    | 391           | 0.948      | 0.227      | 0.004     | 0.005        | C           | 2         | 71           |
| AY616097    | 202           | 0.958      | 0.127      | 0.019     | 0.005        | C           | 1         | 61           |
| AY616100    | 145           | 0.832      | 0.298      | 0.013     | 0.026        | C           | 3         | 47           |
| AY616101    | 209           | 0.899      | 0.545      | 0.003     | 0.007        | C           | 4         | 53           |
| AY616105    | 213           | 0.625      | 0.446      | 0.005     | 0.047        | C           | 5         | 57           |
| AY616106    | 184           | 0.859      | 0.072      | 0.002     | 0.082        | C           | 2         | 40           |
| AY616113    | 185           | 0.065      | 0.903      | 0.018     | 0.091        | M           | 1         | 112          |

The following description of the TargetP output was adapted from:

<http://www.cbs.dtu.dk/services/TargetP-1.0/pages/output-expl.html>).

**Name** is the GenBank accession number for the putatively plastid targeted proteins from *P. wickerhamii*; **Length** is the length of the submitted sequence; **cTP/mTP/SP/other**: The neural network output score for each of the possible categories. The location with the highest score is the

most likely one according to TargetP, and the relation between the scores may be an indication of how certain the prediction is (see column RC). **Loc.** The subcellular localization predicted by TargetP: **C**: Chloroplast, *i.e. the sequence contains a chloroplast transit peptide, cTP*; **M**: Mitochondrion, *i.e. the sequence contains a mitochondrial targeting peptide, mTP*; **S**: Secretory pathway, *i.e. the sequence contains a signal peptide, SP*; **\_**: any other location; **RC**: Reliability Class: a measure of the size of the difference (diff) between the highest (winning) and the second highest output scores. **TPlen**: For sequences predicted to contain a cTP/mTP/SP, this is the predicted *length* of the presequence. For SPs, [SignalP](#) is used in this prediction, and for cTPs, [ChloroP](#) is used.

**Table S1c.** ChloroP prediction results for plastid-targeted proteins from *P. wickerhamii*

| Name     | Length | Score | cTP | CS-score | cTP-length |
|----------|--------|-------|-----|----------|------------|
| AY616038 | 199    | 0.477 | -   | 6.870    | 30         |
| AY616039 | 220    | 0.566 | Y   | 6.442    | 30         |
| AY616045 | 162    | 0.526 | Y   | 4.663    | 23         |
| AY616049 | 220    | 0.516 | Y   | 8.808    | 34         |
| AY616050 | 202    | 0.563 | Y   | 5.312    | 66         |
| AY616056 | 251    | 0.498 | -   | 1.105    | 76         |
| AY616059 | 146    | 0.553 | Y   | 2.369    | 21         |
| AY616060 | 211    | 0.552 | Y   | 3.426    | 32         |
| AY616061 | 337    | 0.503 | Y   | 5.246    | 54         |
| AY616063 | 200    | 0.465 | -   | 5.207    | 27         |
| AY616065 | 159    | 0.573 | Y   | 9.314    | 43         |
| AY616069 | 150    | 0.537 | Y   | 6.341    | 34         |
| AY616070 | 215    | 0.558 | Y   | 9.844    | 40         |
| AY616071 | 209    | 0.567 | Y   | 11.055   | 37         |
| AY616072 | 210    | 0.577 | Y   | 4.368    | 47         |
| AY616074 | 188    | 0.463 | -   | 3.642    | 23         |
| AY616075 | 204    | 0.547 | Y   | 5.458    | 47         |
| AY616077 | 230    | 0.575 | Y   | 5.718    | 59         |
| AY616080 | 186    | 0.545 | Y   | 8.454    | 45         |
| AY616081 | 213    | 0.538 | Y   | 4.033    | 52         |
| AY616083 | 211    | 0.541 | Y   | 7.047    | 36         |
| AY616084 | 212    | 0.547 | Y   | 3.284    | 48         |
| AY616085 | 244    | 0.545 | Y   | 5.801    | 71         |
| AY616086 | 221    | 0.536 | Y   | 5.488    | 60         |
| AY616088 | 215    | 0.557 | Y   | 5.250    | 24         |
| AY616089 | 187    | 0.541 | Y   | 1.609    | 33         |
| AY616091 | 431    | 0.467 | -   | 0.635    | 17         |
| AY700207 | 208    | 0.573 | Y   | 4.985    | 50         |
| AY700208 | 190    | 0.574 | Y   | 7.890    | 41         |
| AY616099 | 240    | 0.542 | Y   | 4.968    | 52         |
| AY616093 | 204    | 0.485 | -   | 6.354    | 20         |
| AY616094 | 229    | 0.522 | Y   | 5.818    | 52         |
| AY616096 | 391    | 0.587 | Y   | 3.876    | 71         |
| AY616097 | 202    | 0.589 | Y   | 6.208    | 61         |
| AY616100 | 145    | 0.560 | Y   | 6.572    | 47         |
| AY616101 | 209    | 0.561 | Y   | 5.961    | 53         |
| AY616105 | 213    | 0.526 | Y   | 0.551    | 57         |
| AY616106 | 184    | 0.578 | Y   | 4.978    | 40         |
| AY616113 | 185    | 0.507 | Y   | 8.993    | 48         |

The following description of the ChloroP output was adapted from:

<http://www.cbs.dtu.dk/services/ChloroP-1.1/pages/output-expl.php>).

**Name** is the GenBank accession number for the putatively plastid targeted proteins from *P. wickerhamii*; **Length** is the length of the submitted sequence; **Score** is the output score from the

second step network. The prediction cTP/no cTP is based solely on this score; **cTP** tells whether or not this is predicted as a cTP-containing sequence; "Y" means that the sequence *is* predicted to contain a cTP; "-" means that is predicted *not* to contain a TP. **CS-score** is the MEME scoring matrix score for the suggested cleavage site. **cTP-length** is the predicted length of the presequence (**Please note** that the prediction of the transit peptide length is carried out and presented *even if* its presence is not predicted).

**Table S1d.** Predotar prediction results for plastid-targeted proteins from *P. wickerhamii*

| Sequence | Mitochondrial score | Plastid score | Prediction    |
|----------|---------------------|---------------|---------------|
| AY616038 | 0.986               | 0.001         | mitochondrial |
| AY616039 | 0.005               | 0.633         | plastid       |
| AY616045 | 0.000               | 0.165         | neither       |
| AY616049 | 0.628               | 0.218         | mitochondrial |
| AY616050 | 0.170               | 0.915         | plastid       |
| AY616056 | 0.039               | 0.180         | neither       |
| AY616059 | 0.420               | 0.850         | plastid       |
| AY616060 | 0.034               | 0.995         | plastid       |
| AY616061 | 0.028               | 0.009         | neither       |
| AY616063 | 0.604               | 0.262         | mitochondrial |
| AY616065 | 0.011               | 0.989         | plastid       |
| AY616069 | 0.016               | 0.380         | neither       |
| AY616070 | 0.906               | 0.008         | mitochondrial |
| AY616071 | 0.816               | 0.523         | both          |
| AY616072 | 0.426               | 0.799         | plastid       |
| AY616074 | 0.000               | 0.000         | neither       |
| AY616075 | 0.011               | 0.998         | plastid       |
| AY616077 | 0.008               | 0.998         | plastid       |
| AY616080 | 0.001               | 0.431         | neither       |
| AY616081 | 0.512               | 0.747         | both          |
| AY616083 | 0.998               | 0.000         | mitochondrial |
| AY616084 | 0.249               | 0.243         | neither       |
| AY616085 | 0.986               | 0.043         | mitochondrial |
| AY616086 | 0.000               | 0.001         | neither       |
| AY616088 | 0.337               | 0.776         | plastid       |
| AY616089 | 0.906               | 0.246         | mitochondrial |
| AY616091 | 0.000               | 0.022         | neither       |
| AY700207 | 0.314               | 0.946         | plastid       |
| AY700208 | 0.012               | 0.988         | plastid       |
| AY616099 | 0.198               | 0.895         | plastid       |
| AY616093 | 0.111               | 0.041         | neither       |
| AY616094 | 0.009               | 0.141         | neither       |
| AY616096 | 0.010               | 0.403         | neither       |
| AY616097 | 0.015               | 0.997         | plastid       |
| AY616100 | 0.030               | 0.944         | plastid       |
| AY616101 | 0.162               | 0.601         | plastid       |
| AY616105 | 0.442               | 0.189         | neither       |
| AY616106 | 0.801               | 0.398         | mitochondrial |
| AY616113 | 0.998               | 0.000         | mitochondrial |
