# Supplementary material
Source: PubMed Central journal article supplement (PMC549340)
Supplement: eukcell_4_2_253__3.pdf [file eukcell_4_2_253__3.pdf]

## Supplementary data

**Table S3.** Putatively plastid-targeted proteins in *P. wickerhamii* for which the N-half of the protein was not identified (N-half truncated clones). The sequences presented in the table cover the middle or the C-half of the mature protein.

|   | Protein                                                                                                                                                                                                                                                                                                            | Comments         | Intracellular localization in plants and algae <sup>a</sup> |
|---|--------------------------------------------------------------------------------------------------------------------------------------------------------------------------------------------------------------------------------------------------------------------------------------------------------------------|------------------|-------------------------------------------------------------|
| 1 | >AY616041; heat shock 70 protein<br>AVVSLVERLAKKKPNVTVPNPDEVVALGAAVQGGVLAGEVSDIVLLDVTPLSLGLETLGGVATKVIPR<br>NTTLPTSKTETTFSTAADSQSSVEVNVLQGEREFARDNKSLGNFRLDGIPPAPRGVVPQIEVRFDIDANGIL<br>SVTASDKGTGKSQDIKITGASTLPSDEVERMVQDAERFS                                                                                    |                  | <b>P<sup>#</sup></b>                                        |
| 2 | >AY616043; protein disulfide isomerase<br>HPARGHLLRRQMFDES DVVVLTVKNFEVELRKQKYALVEFYAPWCGHCKSLKPAYAAAATEVKKL<br>GLPVVLAKVDATVEADLGSQFEVRYPTLKWVNGKVASDFGGGRTKDDIVRWVSKKSGPATTDLE<br>SVAALET                                                                                                                        | See <sup>b</sup> | <b>P<sup>#</sup></b>                                        |
| 3 | >AY616044; poly(A) binding protein RB47 homologue<br>LDRDVTEAQLYEIFAQIGPVASIRVCRDAVTRRSLGYAYVNYNSGVDAGAAERALEQLNYVPLGRTP<br>HAADVEPPRPSYRKSGVGNIFIKNLGRLPLTRPWFDTFSTFGNILSC                                                                                                                                        |                  | <b>P<sup>#</sup></b>                                        |
| 4 | >AY616048; SecA-type chloroplast protein transport factor – related<br>SQLRCAFLAIKAEFKA VTDVERTRVVALGGLHVIGTERHESRRIDNQLRGRSGRQGDPTTQFFLSLED<br>NIFRVFGGDRIQTLMSALHIGDLPIESKMLTGALDGAQRKVEAYYFDARKQLFDYDQVLDIQRGRVYE<br>ERRRALLAPDLTPVMLDYARKTVDDILEANVDPKTSVDSWPIEALASKMVQYCPHIDFGPECLWQA<br>ARTKGYAGLRALLWRRGEAA |                  | <b>P<sup>#</sup></b>                                        |
| 5 | >AY616053; phosphoglucomutase<br>EAVQIILKLAAGNGLQKVVVGRNGITATPAMSAIIRRRGLYGLIMSASHNPAGPNEDWGIKFNYSSG<br>EPAPEKITDKIYGFTQSIKELQVADIPDVLDSVLGTTTTFGDFEVEVIDYTVDYFNQLKEVDFEALRTLL<br>ASPDFSFVYDALHAVTGAYAEPFLVDELGASPDLSKNCVPLEDFGGGHP                                                                                | See <sup>c</sup> | <b>P, C</b>                                                 |

---

|    |                                                                                                                                                                                                                                                                                              |                |
|----|----------------------------------------------------------------------------------------------------------------------------------------------------------------------------------------------------------------------------------------------------------------------------------------------|----------------|
| 6  | >AY616062; starch synthase isoform SS III<br>VKLEPLSEAVVVKRNGLSPGSWVGAKVDIDKLAMLVDFVFSNVARTTWDNNDSDADYHSLVSGALKDK<br>ELGLVLASDAMARDAGEAAKQEDLAVKRAVEKAEIKYTSAKQRRAVQAAFLYTRPLTPRAGQAVEV<br>FYNPDLTPLRGRPEVYVRGGFDRWTRNTFSPQAMRATGTGGFVTTTIQVPRTAHVMDLVFMDSGDA<br>HGGFIDNRGLDYHMPVAGAPGKL     | P              |
| 7  | >AY616087; cystathionine gamma-synthase (O-succinylhomoserine (thiol)-lyase)<br>PKMGISATVIDPADLAGLEAALEAHPVALFFSESPTNPYLRCVDIPRIKALCEPRGAAVVIDSTFATPIN<br>QRALALGADLVLHSATKYLSGHNDVLAGAIAGRSDLVASVRAMHNVLGGVMDPHAAAYLLLRGMKT<br>LDLRVGRANATAQLLAERLSEHPRVARVHYPLPSHPDHIALRQMDGYGGVVSFEVAGDLW | P              |
| 8  | >AY616090; L aspartate oxidase<br>AHPLPGRGHHAGHGGVVRGSCTPLTTNPGVATGDGMAMAARAGARLGGLEFVQFHPTVLVAPAAAG<br>AGGHADADRAFLISEAVRGEGRLFNVDGERFMNRYDPARRELAPRDVVARAIHAEMASTGRDHVL<br>LDVSHLAREEVLSHFPTIAARCAALGLDLTRQALPVAPGQHYMCGGVATGLHGETSLSGLFAAGEVA<br>SSG                                      | P <sup>#</sup> |
| 9  | >AY616092; ferredoxin-dependent glutamate synthase<br>LIRADGGMRTGRDVLVAAALGADEYGFQTVAMIATGCIMARVCHTNNCPVGVASQREELRKRFPGT<br>PEDLVNYFMFIGEEVRASLASLGLRSLDDLIGRGNLYRQRSDVTLAKTASLDLSILTRYAGDCARSSTR<br>RTASPHDNGSDWDDVILADPEVQAAIAGQGTVARSYTIVNTDRAALGRLGGAIARLHGDDRFEGR<br>IDDLRGSAGQS        | P              |
| 10 | >AY616098; ATP phosphoribosyltransferase.<br>VAREFFASRGFEHVKLLSADGALEAAPAMGFADIILDLVSSGVTLRENNLREIEGGRVMASQGVLVAS<br>RAALLERPGLLELVHELL                                                                                                                                                      | P <sup>#</sup> |
| 11 | >AY700210; Histidinol dehydrogenase<br>KEVRAAFDIARANIAAFHAAQASPDLVHETMPGVSCSRVTRAIGAVGLYVPGGTAVLPSSALMLGVP<br>AGLAGCRTIVLATPPGPDGSIPAEVLYCARAAGVTHVLAAGGAQAVAALAWGTASCPKVDKVLGPG<br>NQYVTAAKVALAAGEAMVAIDMPAGPSEVLVADAGADLVHVALDLLSQAHEGPDQSAILVALPGL<br>DVAALRAEVARQCDALP                   | P              |
| 12 | >AY616102; ferredoxin-NADP reductase<br>HEQLESIGLPLNTFNRRKPFARIVSVDRIVGPKATGETYHVVLETRGEIPFAEGQSYGVIPPGSKVNSK<br>KKEVPHGTRLYSIASTRYGDFFDGRTASLCVRRATYWDPETGAEDPAKKGICSNFLCDAKPGQEV                                                                                                           | P              |

---

---

|    |                                                                                                                                                                                                                                                                                                                          |                |
|----|--------------------------------------------------------------------------------------------------------------------------------------------------------------------------------------------------------------------------------------------------------------------------------------------------------------------------|----------------|
| 13 | >AY616108; hydroxymethylbutenyl 4-diphosphate synthase, similar to <i>E. coli</i> gcpE gene product<br>LHRDGSVLSALSLEDLHKPDATYRSLGCKMAVGMPEFKDIATSDSVYLTEVPAVDDAVARRALRRLQE<br>VGVHVLAEADALVASPLPDSIAVVSLAEAVAAAREGRSLLPPGAVRLALAIIDGTESEAEAAATGGLDA<br>TLALLRTAPGLSRVHASRRVFEALARAHCTLPVIHALAFQAGTGREALVLAAGALVGALMVDGR | P <sup>#</sup> |
| 14 | >AY616109; glutamate 1-semialdehyde aminotransferase<br>RHQNPKILDRPGVYEQDRVTNVLVAGLLQAGRETGHDMCGGSINAMFGFFFAKGPVTNFEDAKTA<br>DGAKFAKFHRGMLEHG                                                                                                                                                                            | P              |
| 15 | >AY616111; uroporphyrinogen III synthase<br>SESCYEHTNNASVPRAGRLVRRKCDSEFARWSSRRLVVLTRHEGKNEDESLLCARGIESLKLPMIET<br>VDGPDRLLLGSFLCDEDFEWICLSSPEAAAVFMRAWQEVGQPPPIAAVGSQTARVLRHLGGPECIPGF<br>MPSVATAEHFAGELPWGKGRNLNRVLYPTSARAXQSLQWILEGRGFAVTRLNTYDTIPVKHVDADFLE<br>QARNAAMVAISSTSAGRSWISTIGQ                             | P <sup>#</sup> |

---

<sup>a</sup>The intracellular localization in land plants and algae of the proteins which are similar to those identified in *P. wickerhamii* was compiled from the Brenda (<http://www.brenda.uni-koeln.de>), TAIR (<http://www.arabidopsis.org/index.jsp>) and Gramene (<http://www.gramene.org>) databases, and from journal articles related to the best-BLAST proteins. The Brenda database provides comprehensive information about enzymes for which the intracellular localization was determined by experiments such as immunolocalization and subcellular fractionation. For enzymes for which this kind of data is not present in the Brenda database and for proteins that are not enzymes, we used the other aforementioned sources. In this situation the abbreviation for intracellular localization is marked with #. Abbreviations: P, plastid targeted; M, mitochondrial targeted; C, cytosolic; ER, endoplasmic reticulum (i.e., microsomal fraction).

<sup>b</sup>AY616043. The best blast hits are for the protein disulfide isomerases from the algal species *C. reinhardtii* (accession number AAD02069), *Volvox carteri* f. *nagariensis* (accession number AAD55566), and *Helicosporidium* sp. (AAU07697). All these proteins

have N-terminal extensions predicted to represent a signal-peptide (ER-localization) by both TargetP and iPSORT. ChloroP and Predotar, which can discriminate only between mitochondrial and plastid transit-peptides also failed to identify these extensions as plastid transit-peptides. Moreover, the protein disulfide isomerases from the algal species *C. reinhardtii* and *V. carteri* and from land plants possess the C-terminal ER-retention signal KDEL (for *Helicosporidium* sp. protein disulfide isomerase the C-half of the protein is not available in databases). Evidence for plastid localization comes from *C. reinhardtii* protein disulfide isomerase, for which several studies demonstrated that it is a regulator of the plastid translational activation (27, 54). However, based on the abovementioned structural features, a dual localization, i.e., in the plastid and ER, was also suggested for this protein (54).

<sup>c</sup>AY616053. For the enzyme phosphoglucomutase, the best BLASTX hits are for the plastid isozyme (bit score 263, e value  $2e^{-69}$ ) followed by the cytosolic isozyme (bit score 232, e value  $3e^{-60}$ ), both from land plants. The alignment of the 187 amino acids from *P. wickerhamii* with plastid and cytosolic land plant isozymes, *C. reinhardtii* and cyanobacterial enzymes revealed that the cytosolic isozymes from land plants have three insertion of 6, VG(A/V)DGS, 1 and 4 residues (S/T)GPE, respectively, that are not present in *P. wickerhamii*.
